# Supplementary material for: Proteomic analysis of membrane proteins from a radioresistant and moderate thermophilic bacterium Deinococcus geothermalis
Source: Royal Society of Chemistry journal article supplement (doi:10.1039/c004875e), 2010-08-11
Supplement: c004875e_fig1_sch1_tab1_tab5.pdf [file c004875e_fig1_sch1_tab1_tab5.pdf]

**Supporting Information Figure 1.** 1-D PAGE of a representative sample of the upper aqueous phase from protein extraction by the temperature-dependent phase partition with Triton X-114 detergent. Proteins were separated by 10% SDS-PAGE and stained with CBB. Lane A and B refer to the cytoplasmic proteins in the aqueous phase and total cell proteins, respectively. Molecular weight markers are indicated on the left (kDa).

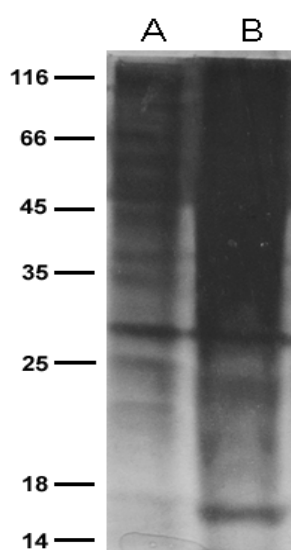

**Supporting Information Scheme 1.** Construction of transformation vectors containing the targeted gene which was fused to eGFP gene. The plasmid pRADG (lab store) containing chloramphenicol resistance gene and the enhanced green fluorescence protein gene (eGFP, BD Clontech, USA), which is under the control of the *groEL* gene promoter (*PgroEL*), was constructed as described previously (see the reference below). Restriction sites relevant for the construction of the vectors were indicated.

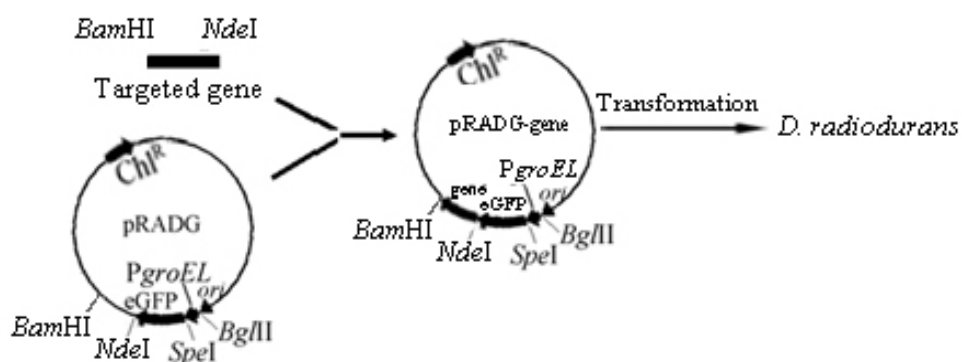

**Reference:**

Gao GuanJun, Fan Lu, Lu HuiMing and Hua YueJin. Engineering *Deinococcus radiodurans* into biosensor to monitor radioactivity and genotoxicity in environment. *Chinese Science Bulletin*, 2008, 53(11): 1675-1681.

**Supplementary Information Table 1. List of identified membrane proteins  
of *D. geothermalis***

| Accession No.         | Gene name  | Protein description                                            | Function (COG) <sup>a)</sup>            | GRAVY value  | No. of TMDs | Ortholog in <i>DR</i> or <i>DD</i> <sup>b), c)</sup>              |
|-----------------------|------------|----------------------------------------------------------------|-----------------------------------------|--------------|-------------|-------------------------------------------------------------------|
| <b>Inner membrane</b> |            |                                                                |                                         |              |             |                                                                   |
| <b>Metabolism</b>     |            |                                                                |                                         |              |             |                                                                   |
| gi 94984425           | Dgeo_0317  | cytochrome c, class I                                          | Energy production and conversion        | 0.401        | 5           | DR0434 <sup>c</sup><br>Deide_20670 <sup>c</sup>                   |
| gi 94984126           | Dgeo_0017  | cytochrome c oxidase, subunit I                                | Energy production and conversion        | 0.701        | 13          | ND                                                                |
| gi 94984427           | Dgeo_0319  | cytochrome b/b6-like protein                                   | Energy production and conversion        | 0.572        | 8           | DR0436 <sup>c</sup><br>Deide_20650                                |
| gi 94984515           | Dgeo_0407  | cytochrome c oxidase, subunit II                               | Energy production and conversion        | -0.241       | 3           | DR2619<br>Deide_18320 <sup>c</sup>                                |
| gi 94986150           | Dgeo_2051  | <b>H<sup>+</sup>-transporting two-sector ATPase, C subunit</b> | <b>Energy production and conversion</b> | <b>0.896</b> | <b>3</b>    | <b>DR0696<sup>c</sup><br/>Deide_00950<sup>c</sup></b>             |
| gi 94986151           | Dgeo_2052  | V-type ATPase, 116 kDa subunit                                 | Energy production and conversion        | 0.274        | 8           | DR0695 <sup>c</sup><br>Deide_00940 <sup>c</sup>                   |
| gi 94972172           | Dgeo_2705* | cytochrome bd ubiquinol oxidase, subunit I                     | Energy production and conversion        | 0.472        | 9           | ND                                                                |
| gi 94986435           | Dgeo_2338  | pyruvate dehydrogenase (lipoamide)                             | Energy production and conversion        | -0.23        | 3           | DR0029,<br>Deide_23440 <sup>c</sup> ,<br>Deide_03910 <sup>c</sup> |
| gi 94972171           | Dgeo_2704* | cytochrome d ubiquinol oxidase, subunit II                     | Energy production and conversion        | 0.67         | 9           | ND                                                                |
| gi 94985776           | Dgeo_1676  | ABC-2 type transporter                                         | Inorganic ion transport and metabolism  | 0.488        | 7           | DR0926<br>Deide_15080                                             |
| gi 94984323           | Dgeo_0215  | cation diffusion facilitator family transporter                | Inorganic ion transport and metabolism  | 0.426        | 6           | DR1102<br>Deide_11280                                             |
| gi 94984757           | Dgeo_0650  | phosphate ABC transporter, permease protein                    | Inorganic ion transport and metabolism  | 0.683        | 6           | DRA0158<br>Deide_2p01890 <sup>c</sup>                             |

|                    |                  | PstC                                                                 |                                                              |               |          |                                                                                                                                                   |
|--------------------|------------------|----------------------------------------------------------------------|--------------------------------------------------------------|---------------|----------|---------------------------------------------------------------------------------------------------------------------------------------------------|
| gi 94986310        | Dgeo_2211        | Mg2+ transporter protein, CorA-like protein                          | Inorganic ion transport and metabolism                       | 0.039         | 3        | DR2463<br>Deide_22130                                                                                                                             |
| gi 94985848        | Dgeo_1748        | phosphate transporter                                                | Inorganic ion transport and metabolism                       | 0.865         | 8        | DR0925<br>Deide_03410                                                                                                                             |
| gi 94985443        | Dgeo_1343        | binding-protein-dependent transport systems inner membrane component | Inorganic ion transport and metabolism                       | 0.583         | 7        | DR1570 <sup>C</sup><br>Deide_11070                                                                                                                |
| gi 94986222        | Dgeo_2123        | binding-protein-dependent transport systems inner membrane component | Inorganic ion transport and metabolism                       | 0.672         | 6        | DR0364 <sup>C</sup><br>Deide_19120 <sup>C</sup>                                                                                                   |
| gi 158421518       | Dgeo_3006*       | CCC1 related, iron/manganese transporter component, DUF125           | Inorganic ion transport and metabolism                       | 0.295         | 4        | ND                                                                                                                                                |
| gi 94984532        | Dgeo_0424        | AMP-dependent synthetase and ligase                                  | Secondary metabolites biosynthesis, transport and catabolism | -0.139        | 1        | DR0336,<br>DR2507<br>Deide_04270 <sup>C</sup>                                                                                                     |
| gi 94985129        | Dgeo_1024        | tryptophan synthase subunit beta                                     | Amino acid transport and metabolism                          | -0.066        | 3        | DR0941<br>Deide_11760                                                                                                                             |
| <b>gi 94985291</b> | <b>Dgeo_1189</b> | <b>extracellular solute-binding protein, family 5</b>                | <b>Amino acid transport and metabolism</b>                   | <b>-0.338</b> | <b>1</b> | <b>DR1290<sup>C</sup>,<br/>DR1712,<br/>DR1955<sup>C</sup>,<br/>DRA0246<sup>C</sup><br/>Deide_10250<sup>C</sup>,<br/>Deide_3p02270<sup>C</sup></b> |
| gi 94985308        | Dgeo_1206        | inner-membrane translocator                                          | Amino acid transport and metabolism                          | 1.015         | 7        | DR1037 <sup>C</sup><br>Deide_12600 <sup>C</sup>                                                                                                   |
| gi 94985168        | Dgeo_1064        | ABC transporter related                                              | Amino acid transport and metabolism                          | -0.159        | 0        | DR1648 <sup>C</sup><br>Deide_07730 <sup>C</sup>                                                                                                   |
| gi 94984433        | Dgeo_0325*       | binding-protein-d                                                    | Amino acid                                                   | 0.676         | 6        | ND                                                                                                                                                |

|             |            |                                                                                                                           |                                                                      |              |          |                                                             |
|-------------|------------|---------------------------------------------------------------------------------------------------------------------------|----------------------------------------------------------------------|--------------|----------|-------------------------------------------------------------|
| gi 94985442 | Dgeo_1342  | dependent transport systems inner membrane component binding-protein-dependent transport systems inner membrane component | transport and metabolism                                             | 0.427        | 6        | DR1569 <sup>C</sup><br>Deide_11080 <sup>C</sup>             |
| gi 94985441 | Dgeo_1341  | oligopeptide/dipeptide ABC transporter, ATP-binding protein-like protein                                                  | Amino acid transport and metabolism                                  | -0.1         | 0        | DR1568 <sup>C</sup><br>Deide_11090 <sup>C</sup>             |
| gi 94985440 | Dgeo_1340  | oligopeptide/dipeptide ABC transporter, ATP-binding protein-like protein                                                  | Amino acid transport and metabolism                                  | -0.077       | 0        | DR1567 <sup>C</sup><br>Deide_11100 <sup>C</sup>             |
| gi 94985899 | Dgeo_1799  | major intrinsic protein                                                                                                   | Carbohydrate transport and metabolism                                | 1.103        | 6        | DR1929 <sup>C</sup>                                         |
| gi 94972088 | Dgeo_2620* | phosphotransferase system, glucose-specific IIBC component                                                                | Carbohydrate transport and metabolism                                | 0.502        | 12       | ND                                                          |
| gi 94985474 | Dgeo_1374  | Sugar ABC transporter, ATP-binding protein                                                                                | General function prediction only                                     | -0.058       | 1        | DR0957 <sup>C</sup><br>Deide_08550 <sup>C</sup>             |
| gi 94985185 | Dgeo_1081  | <b>6-phosphoglucosate dehydrogenase, NAD-binding</b>                                                                      | <b>Lipid transport and metabolism</b>                                | <b>0.293</b> | <b>3</b> | <b>DR0499<sup>C</sup></b><br><b>Deide_10300<sup>C</sup></b> |
| gi 94984254 | Dgeo_0146  | <b>short chain dehydrogenase</b>                                                                                          | <b>Lipid transport and metabolism</b>                                | <b>0.195</b> | <b>4</b> | <b>DR0113</b>                                               |
| gi 94984450 | Dgeo_0342  | protein-tyrosine kinase                                                                                                   | <b>Cellular processes</b><br>Cell cycle control, mitosis and meiosis | -0.085       | 1        | DRA0033<br>Deide_20321 <sup>C</sup>                         |

|                    |                  |                                                         |                                                                                 |               |          |                                                                                     |
|--------------------|------------------|---------------------------------------------------------|---------------------------------------------------------------------------------|---------------|----------|-------------------------------------------------------------------------------------|
| gi 94985754        | Dgeo_1654        | cell division<br>FtsK/SpolIIE                           | Cell cycle control,<br>mitosis and<br>meiosis                                   | -0.078        | 4        | DR0400<br>Deide_15050                                                               |
| gi 94972109        | Dgeo_2642        | ExoP-related<br>protein                                 | Cell cycle control,<br>mitosis and<br>meiosis                                   | -0.059        | 0        | DRA0033                                                                             |
| gi 94985172        | Dgeo_1068        | peptidoglycan<br>glycosyltransferase                    | Cell<br>wall/membrane<br>biogenesis                                             | -0.345        | 1        | DR1417 <sup>C</sup><br>Deide_08370,<br>Deide_18450 <sup>C</sup>                     |
| gi 94986065        | Dgeo_1966        | prolipoprotein<br>diacylglycerol<br>transferase         | Cell<br>wall/membrane<br>biogenesis                                             | 0.406         | 7        | DR0807<br>Deide_07510 <sup>C</sup>                                                  |
| gi 94984517        | Dgeo_0409        | cytochrome<br>oxidase assembly                          | Posttranslational<br>modification,<br>protein turnover,<br>chaperones           | 0.838         | 8        | DR2617,<br>Deide_18300                                                              |
| <b>gi 94984581</b> | <b>Dgeo_0474</b> | <b>FeS assembly<br/>ATPase SufC</b>                     | <b>Posttranslational<br/>modification,<br/>protein turnover,<br/>chaperones</b> | <b>-0.169</b> | <b>0</b> | <b>DR2107<br/>Deide_03350<sup>C</sup></b>                                           |
| gi 94985346        | Dgeo_1245        | cytochrome c<br>assembly protein                        | Posttranslational<br>modification,<br>protein turnover,<br>chaperones           | 0.515         | 6        | DR0348 <sup>C</sup><br>Deide_08320                                                  |
| gi 94985348        | Dgeo_1247        | cytochrome c<br>assembly protein                        | Posttranslational<br>modification,<br>protein turnover,<br>chaperones           | 0.642         | 15       | DR0346<br>Deide_08300                                                               |
| gi 94986281        | Dgeo_2182        | ATP-dependent<br>metalloprotease<br>FtsH                | Posttranslational<br>modification,<br>protein turnover,<br>chaperones           | -0.172        | 2        | DRA0290 <sup>C</sup> ,<br>Deide_01120 <sup>C</sup> ,<br>Deide_23310,<br>Deide_18550 |
| gi 94984110        | Dgeo_0001        | chromosomal<br>replication<br>initiator protein<br>DnaA | Replication,<br>recombination<br>and repair                                     | -0.279        | 3        | DR0002<br>Deide_00010 <sup>C</sup>                                                  |
| gi 94985370        | Dgeo_1269*       | sensor, signal<br>transduction<br>histidine kinase      | Signal<br>transduction<br>mechanisms                                            | -0.335        | 0        | DR2416<br>Deide_10780 <sup>C</sup>                                                  |
| gi 94984237        | Dgeo_0129*       | histidine kinase                                        | Signal<br>transduction<br>mechanisms                                            | -0.143        | 0        | DR2244<br>Deide_19810                                                               |
| gi 94986195        | Dgeo_2096*       | multi-sensor,<br>signal                                 | Signal<br>transduction                                                          | -0.186        | 1        | ND                                                                                  |

|             |            |                                                                                        |                                                                          |               |          |                                                                       |
|-------------|------------|----------------------------------------------------------------------------------------|--------------------------------------------------------------------------|---------------|----------|-----------------------------------------------------------------------|
| gi 94985162 | Dgeo_1058* | transduction<br>histidine kinase<br><b>preprotein<br/>translocase<br/>subunit SecA</b> | mechanisms<br><b>Intracellular<br/>trafficking and<br/>secretion</b>     | -0.372        | 0        | <b>DR0575<br/>Deide_17210<sup>C</sup></b>                             |
| gi 94985340 | Dgeo_1239* | bifunctional<br>preprotein<br>translocase<br>subunit<br>SecD/SecF                      | Intracellular<br>trafficking and<br>secretion                            | 0.269         | 11       | DR1822 <sup>C</sup><br>Deide_10360 <sup>C</sup>                       |
| gi 94985854 | Dgeo_1754  | MotA/TolQ/ExbB<br>proton channel                                                       | Intracellular<br>trafficking and<br>secretion                            | 0.508         | 3        | DR0456 <sup>C</sup><br>Deide_03360                                    |
| gi 94985947 | Dgeo_1847* | preprotein<br>translocase<br>subunit SecY                                              | Intracellular<br>trafficking and<br>secretion                            | 0.557         | 10       | DR2116 <sup>C</sup><br>Deide_18750                                    |
| gi 94984755 | Dgeo_0648  | ABC transporter<br>related                                                             | Defense<br>mechanisms                                                    | 0.137         | 5        | DR0096,<br>DR2052<br>Deide_06140                                      |
| gi 94986215 | Dgeo_2116* | acriflavin<br>resistance protein                                                       | Defense<br>mechanisms                                                    | 0.441         | 14       | DR0740 <sup>C</sup>                                                   |
| gi 94984802 | Dgeo_0695  | <b>basic membrane<br/>lipoprotein</b>                                                  | <b>Poorly<br/>characterized<br/>General function<br/>prediction only</b> | <b>-0.096</b> | <b>1</b> | <b>DR2070<sup>C</sup><br/>Deide_20440<sup>C</sup></b>                 |
| gi 94984810 | Dgeo_0703  | basic membrane<br>lipoprotein                                                          | General function<br>prediction only                                      | 0.042         | 0        | DR2070 <sup>C</sup><br>Deide_20440 <sup>C</sup>                       |
| gi 94984645 | Dgeo_0538  | protein of<br>unknown function<br>UPF0005                                              | General function<br>prediction only                                      | 1.129         | 7        | DR0893<br>Deide_16610 <sup>C</sup>                                    |
| gi 94984657 | Dgeo_0550  | peptidase M50                                                                          | General function<br>prediction only                                      | 0.924         | 5        | DR0982 <sup>C</sup><br>Deide_06230<br>DR2176,<br>DRB0128,<br>DRB0129, |
| gi 94985386 | Dgeo_1285  | protein of<br>unknown function<br>DUF21                                                | General function<br>prediction only                                      | 0.126         | 4        | Deide_11960,<br>Deide_3p01910                                         |
| gi 94985790 | Dgeo_1690  | inner-membrane<br>translocator                                                         | General function<br>prediction only                                      | 0.667         | 14       | Deide_3p01900<br>DR0250 <sup>C</sup><br>Deide_07820                   |
| gi 94985791 | Dgeo_1691  | inner-membrane<br>translocator                                                         | General function<br>prediction only                                      | 0.93          | 9        | DR0251<br>Deide_07810 <sup>C</sup>                                    |

|                                        |                  |                                                       |                                        |               |          |                                                   |
|----------------------------------------|------------------|-------------------------------------------------------|----------------------------------------|---------------|----------|---------------------------------------------------|
| gi 94985813                            | Dgeo_1713        | protein of unknown function UPF0118                   | General function prediction only       | 0.978         | 8        | DR0252 <sup>c</sup> , DR0898, DR1188, Deide_07790 |
| gi 94984694                            | Dgeo_0587        | ABC transporter related                               | General function prediction only       | -0.312        | 1        | DR2134 Deide_03770 DR1864                         |
| gi 94984871                            | Dgeo_0764        | protein of unknown function DUF423                    | Function unknown                       | 0.962         | 3        |                                                   |
| gi 94985302                            | Dgeo_1200        | protein of unknown function DUF1622                   | Function unknown                       | 0.31          | 3        | DR1328                                            |
| gi 94985117                            | Dgeo_1012        | hypothetical protein Dgeo_1012                        | Function unknown                       | 0.278         | 5        | DR0790 Deide_10450 <sup>c</sup>                   |
| gi 94984309                            | Dgeo_0201        | hypothetical protein                                  | Not in COGs                            | 0.326         | 7        | DR0160 <sup>c</sup> Deide_00400 <sup>c</sup>      |
| gi 94984334                            | Dgeo_0226        | TM2                                                   | Not in COGs                            | 0.164         | 3        | DR2326 Deide_20790                                |
| gi 94984800                            | Dgeo_0693        | hypothetical protein                                  | Not in COGs                            | 0.713         | 5        | DR1770                                            |
| gi 94984853                            | Dgeo_0746        | hypothetical protein                                  | Not in COGs                            | 0.835         | 4        | ND                                                |
| gi 94985324                            | Dgeo_1222        | hypothetical protein                                  | Not in COGs                            | 0.329         | 3        | DR1483 <sup>c</sup>                               |
| <b>gi 94986094</b>                     | <b>Dgeo_1995</b> | <b>hypothetical protein</b>                           | <b>Not in COGs</b>                     | <b>0.522</b>  | <b>4</b> | <b>ND</b>                                         |
| <b>gi 116247804</b>                    | <b>Dgeo_1304</b> | <b>glucose-6-phosphate isomerase, gluconeogenesis</b> | <b>Not in COGs</b>                     | <b>-0.224</b> | <b>3</b> | <b>DR1742 Deide_17080<sup>c</sup></b>             |
| <b>Outer membrane</b>                  |                  |                                                       |                                        |               |          |                                                   |
| <b>Metabolism</b>                      |                  |                                                       |                                        |               |          |                                                   |
| Energy production and conversion       |                  |                                                       |                                        |               |          |                                                   |
| gi 94984159                            | Dgeo_0051        | phosphate acetyltransferase                           | Energy production and conversion       | 0.055         | 0        | DR0073 Deide_23230 <sup>c</sup>                   |
| Inorganic ion transport and metabolism |                  |                                                       |                                        |               |          |                                                   |
| gi 94972220                            | Dgeo_2753        | periplasmic binding protein                           | Inorganic ion transport and metabolism | -0.088        | 0        | DRB0125                                           |
| <b>Cellular processes</b>              |                  |                                                       |                                        |               |          |                                                   |
| Cell wall                              |                  |                                                       |                                        |               |          |                                                   |
| gi 94984927                            | Dgeo_0820        | hydrolase/autolysin                                   | Cell wall/membrane biogenesis          | -0.08         | 1        | Deide_08780 <sup>c</sup>                          |



|                    |                  |                                                      |                                         |               |          |                                                       |
|--------------------|------------------|------------------------------------------------------|-----------------------------------------|---------------|----------|-------------------------------------------------------|
| <b>gi 94985525</b> | <b>Dgeo_1425</b> | <b>surface antigen (D15)</b>                         | <b>Cell wall/membrane biogenesis</b>    | <b>-0.175</b> | <b>0</b> | <b>DR0379<sup>c</sup><br/>Deide_08200<sup>c</sup></b> |
| gi 94986216        | Dgeo_2117        | secretion protein HlyD                               | Cell wall/membrane biogenesis           | -0.113        | 0        | DR0739                                                |
| gi 94986217        | Dgeo_2118        | hypothetical protein                                 | Intracellular trafficking and secretion | -0.057        | 0        | DR0738                                                |
| gi 94985623        | Dgeo_1523        | outer membrane efflux protein                        | Intracellular trafficking and secretion | 0.03          | 0        | DR0737 <sup>c</sup>                                   |
| gi 94985829        | Dgeo_1729        | type II and III secretion system protein             | Intracellular trafficking and secretion | -0.122        | 0        | DR0774 <sup>c</sup><br>Deide_17640 <sup>c</sup>       |
|                    |                  |                                                      | <b>Poorly characterized</b>             |               |          |                                                       |
| gi 94985743        | Dgeo_1643        | peptidase M16C associated                            | General function prediction only        | -0.218        | 1        | DR0617<br>Deide_05430 <sup>c</sup>                    |
| <b>gi 94985554</b> | <b>Dgeo_1454</b> | <b>hypothetical protein</b>                          | <b>Function unknown</b>                 | <b>-0.86</b>  | <b>0</b> | <b>DR1314<sup>c</sup><br/>Deide_22640<sup>c</sup></b> |
| gi 94984223        | Dgeo_0115        | hypothetical protein                                 | Not in COGs                             | -0.327        | 1        | DR2527 <sup>c</sup>                                   |
| gi 94984286        | Dgeo_0178        | Tetratricopeptide TPR_2                              | Not in COGs                             | 0.014         | 4        | DR2271<br>Deide_00230                                 |
| gi 94984825        | Dgeo_0718*       | hypothetical protein                                 | Not in COGs                             | 0.127         | 3        | DR0972<br>Deide_12690 <sup>c</sup>                    |
| gi 94985652        | Dgeo_1552        | hypothetical protein                                 | Not in COGs                             | 0.16          | 0        | DR1371<br>Deide_09711                                 |
| <b>gi 94986167</b> | <b>Dgeo_2068</b> | <b>hypothetical protein</b>                          | <b>Not in COGs</b>                      | <b>0.285</b>  | <b>4</b> | <b>DR0673</b>                                         |
| gi 94986218        | Dgeo_2119        | outer membrane efflux protein                        | Not in COGs                             | 0.127         | 0        | DR0737 <sup>c</sup>                                   |
| gi 94984261        | Dgeo_0153        | OstA-like protein, organic solvent tolerance protein | Not in COGs                             | -0.293        | 0        | DR2319<br>Deide_22270 <sup>c</sup>                    |
|                    |                  |                                                      | <b>Periplasmic Metabolism</b>           |               |          |                                                       |
| gi 94984994        | Dgeo_0887        | succinate dehydrogenase flavoprotein subunit         | Energy production and conversion        | -0.296        | 1        | DR0952 <sup>c</sup><br>Deide_12450 <sup>c</sup>       |
| gi 94985349        | Dgeo_1248        | thiol:disulfide interchange                          | Energy production and                   | 0.011         | 1        | DR0189 <sup>c</sup> ,<br>DR0345,                      |

|                    |                  |                                                                           |                                                         |               |          |                                                                                                                                                                       |
|--------------------|------------------|---------------------------------------------------------------------------|---------------------------------------------------------|---------------|----------|-----------------------------------------------------------------------------------------------------------------------------------------------------------------------|
| gi 94984661        | Dgeo_0554        | protein (Redoxin)<br>extracellular<br>solute-binding<br>protein, family 5 | conversion<br>Amino acid<br>transport and<br>metabolism | -0.46         | 0        | Deide_08290 <sup>c</sup><br>DR0986 <sup>c</sup><br>Deide_06270                                                                                                        |
| gi 94984727        | Dgeo_0620        | extracellular<br>ligand-binding<br>receptor                               | Amino acid<br>transport and<br>metabolism               | 0.117         | 2        | DR0788,<br>DR1038 <sup>c</sup><br>Deide_12590 <sup>c</sup><br>Deide_14600 <sup>c</sup><br>Deide_17040 <sup>c</sup><br><b>DR0788,</b><br><b>DR1038<sup>c</sup></b>     |
| <b>gi 94985307</b> | <b>Dgeo_1205</b> | <b>extracellular<br/>ligand-binding<br/>receptor</b>                      | <b>Amino acid<br/>transport and<br/>metabolism</b>      | <b>-0.049</b> | <b>1</b> | <b>Deide_12590<sup>c</sup></b><br><b>Deide_14600<sup>c</sup></b><br><b>Deide_17040<sup>c</sup></b><br><b>DR0363<sup>c</sup></b>                                       |
| gi 94986221        | Dgeo_2122        | extracellular<br>solute-binding<br>protein, family 5                      | Amino acid<br>transport and<br>metabolism               | -0.387        | 1        | Deide_19110 <sup>c</sup> ,<br>Deide_06270<br>ND                                                                                                                       |
| gi 94984432        | Dgeo_0324*       | extracellular<br>solute-binding<br>protein, family 5                      | Amino acid<br>transport and<br>metabolism               | -0.463        | 1        |                                                                                                                                                                       |
| gi 94984842        | Dgeo_0735        | extracellular<br>ligand-binding<br>receptor                               | Amino acid<br>transport and<br>metabolism               | 0.013         | 0        | DR2122 <sup>c</sup><br>Deide_07020 <sup>c</sup>                                                                                                                       |
| gi 94985164        | Dgeo_1060        | extracellular<br>solute-binding<br>protein, family 3                      | Amino acid<br>transport and<br>metabolism               | -0.051        | 0        | DR2154,<br>DRB0078,<br>Deide_05450 <sup>c</sup><br>Deide_07680 <sup>c</sup><br>Deide_2p01060 <sub>c</sub><br>Deide_3p00160 <sub>c</sub><br>Deide_3p00200 <sub>c</sub> |
| gi 94986058        | Dgeo_1959        | extracellular<br>solute-binding<br>protein, family 3                      | Amino acid<br>transport and<br>metabolism               | 0.001         | 0        | DR2278                                                                                                                                                                |
| gi 94986288        | Dgeo_2189        | extracellular<br>solute-binding<br>protein, family 3                      | Amino acid<br>transport and<br>metabolism               | -0.114        | 1        | DR2610,<br>DR1027,<br>Deide_05450 <sup>c</sup><br>Deide_07680 <sup>c</sup><br>Deide_3p00160 <sub>c</sub><br>Deide_3p00200 <sub>c</sub>                                |

|              |            |                                                                                                                                        |                                                       |               |          |                                                       |
|--------------|------------|----------------------------------------------------------------------------------------------------------------------------------------|-------------------------------------------------------|---------------|----------|-------------------------------------------------------|
|              |            | <b>bifunctional<br/>2',3'-cyclic<br/>nucleotide<br/>2'-phosphodiesterase/3'-nucleotidase<br/>periplasmic<br/>precursor<br/>protein</b> | <b>Nucleotide<br/>transport and<br/>metabolism</b>    | <b>-0.241</b> | <b>1</b> | <b>DR1736<sup>c</sup><br/>Deide_14040<sup>c</sup></b> |
| gi 94971837  | Dgeo_2368  | 5'-Nucleotidase-like                                                                                                                   | Nucleotide<br>transport and<br>metabolism             | -0.166        | 0        | DR0505 <sup>c</sup><br>Deide_13330 <sup>c</sup>       |
| gi 94972218  | Dgeo_2751  | <b>5'-Nucleotidase-like</b>                                                                                                            | <b>Nucleotide<br/>transport and<br/>metabolism</b>    | <b>-0.086</b> | <b>1</b> | <b>DRA0018<br/>Deide_2p0058<br/>0<sup>c</sup></b>     |
| gi 94984794  | Dgeo_0687  | extracellular<br>solute-binding<br>protein, family 1<br>maltose ABC<br>transporter,                                                    | Carbohydrate<br>transport and<br>metabolism           | -0.103        | 0        | Deide_10270 <sup>c</sup>                              |
| gi 94985600  | Dgeo_1500  | extracellular<br>solute-binding<br>protein, family 1<br>glucose<br>dehydrogenase,                                                      | Carbohydrate<br>transport and<br>metabolism           | -0.114        | 1        | DR0561 <sup>c</sup><br>Deide_09500 <sup>c</sup>       |
| gi 94985251  | Dgeo_1149  | Gcd and<br>cytochrome c-like<br>domain                                                                                                 | Carbohydrate<br>transport and<br>metabolism           | -0.27         | 1        | ND                                                    |
| gi 158421433 | Dgeo_2919* | ABC-type sugar<br>transport system,<br>periplasmic<br>component                                                                        | Carbohydrate<br>transport and<br>metabolism           | -0.298        | 1        | ND                                                    |
| gi 94986032  | Dgeo_1933  | ABC transporter<br>periplasmic<br>binding protein,<br>thiB subfamily                                                                   | Coenzyme<br>transport and<br>metabolism               | -0.129        | 1        | DR0262<br>Deide_15830 <sup>c</sup>                    |
| gi 94984232  | Dgeo_0124  | <b>hemin ABC<br/>transporter,<br/>periplasmic<br/>binding protein</b>                                                                  | <b>Inorganic ion<br/>transport and<br/>metabolism</b> | <b>0.075</b>  | <b>0</b> | <b>DRB0014<sup>c</sup></b>                            |
| gi 94984756  | Dgeo_0649  | ABC-type<br>phosphate<br>transporter,<br>periplasmic                                                                                   | Inorganic ion<br>transport and<br>metabolism          | -0.054        | 1        | DRA0157<br>Deide_2p01880 <sup>c</sup>                 |

|                             |            |                                                                                                  |                                                                       |        |   |                                                    |
|-----------------------------|------------|--------------------------------------------------------------------------------------------------|-----------------------------------------------------------------------|--------|---|----------------------------------------------------|
| gi 94985470                 | Dgeo_1370  | binding protein<br>iron ABC<br>transporter,<br>periplasmic<br>binding protein                    | Inorganic ion<br>transport and<br>metabolism                          | -0.126 | 1 | DRB0125<br>Deide_17140 <sup>c</sup>                |
| gi 94971832                 | Dgeo_2363  | putative<br>high-affinity iron<br>ion transporter,<br>periplasmic<br>binding protein             | Inorganic ion<br>transport and<br>metabolism                          | -0.032 | 1 | DRB0007 <sup>c</sup><br>Deide_2p01550 <sup>c</sup> |
| gi 94971967                 | Dgeo_2499  | molybdenum<br>ABC transporter                                                                    | Inorganic ion<br>transport and<br>metabolism                          | 0.055  | 1 | DRA0169 <sup>c</sup>                               |
| gi 94972224                 | Dgeo_2757* | ABC-type<br>Fe <sup>3+</sup> -siderophore<br>transport system,<br>periplasmic<br>binding protein | Inorganic ion<br>transport and<br>metabolism                          | -0.075 | 2 | Deide_2p00380 <sup>c</sup>                         |
| gi 94984134                 | Dgeo_0025  | iron ABC<br>transporter,<br>periplasmic<br>binding protein                                       | Inorganic ion<br>transport and<br>metabolism                          | -0.003 | 1 | DR2588 <sup>c</sup><br>Deide_02140 <sup>c</sup>    |
| gi 94972221                 | Dgeo_2754  | Iron ABC<br>transporter,<br>periplasmic<br>binding protein                                       | Inorganic ion<br>transport and<br>metabolism                          | 0.015  | 1 | DRB0125                                            |
| <b>Cellular processes</b>   |            |                                                                                                  |                                                                       |        |   |                                                    |
| gi 94984211                 | Dgeo_0103  | peptidase S1 and<br>S6,<br>chymotrypsin/Hap                                                      | Posttranslational<br>modification,<br>protein turnover,<br>chaperones | 0.04   | 0 | DR0300<br>Deide_21550 <sup>c</sup>                 |
| gi 94984659                 | Dgeo_0552  | peptidase S1 and<br>S6,<br>chymotrypsin/Hap                                                      | Posttranslational<br>modification,<br>protein turnover,<br>chaperones | 0.001  | 1 | DR1756 <sup>c</sup><br>DR0984,<br>Deide_06250      |
| <b>Poorly characterized</b> |            |                                                                                                  |                                                                       |        |   |                                                    |
| gi 94985232                 | Dgeo_1130  | copper resistance<br>protein CopC                                                                | General function<br>prediction only                                   | 0.373  | 1 | DRA0299,<br>Deide_3p01290 <sup>c</sup>             |

Proteins are grouped by their subcellular locations and molecular functions.  
Previously identified membrane proteins from the cell envelope fraction of *D.*

*geothermalis* E50051 (Hambi 2411) by 2-D MALDI-TOF analysis were shown in bold fonts [1]. The cell culture was grown in the oligotrophic R2 medium where glucose was replaced by starch.

The membrane proteins discussed in this study were indicated with superscript \*.

a) COG functional class ([www.ncbi.nlm.nih.gov/COG](http://www.ncbi.nlm.nih.gov/COG)).

b) Orthologs in *D. radiodurans* or *D. deserti* [2, 3].

c) Previously identified proteins in *D. radiodurans* and *D. deserti* [3, 4]. ND, not found.

### Reference:

[1] Liedert, C., Bernhardt, J., Albrecht, D., Voigt, B., *et al.*, Two-dimensional proteome reference map for the radiation-resistant bacterium *Deinococcus geothermalis*. *Proteomics* 2010, 10, 555-563.

[2] Makarova, K. S., Omelchenko, M. V., Gaidamakova, E. K., Matrosova, V. Y., *et al.*, *Deinococcus geothermalis*: the pool of extreme radiation resistance genes shrinks. *PLoS One* 2007, 2, e955.

[3] de Groot, A., Dulermo, R., Ortet, P., Blanchard, L., *et al.*, Alliance of proteomics and genomics to unravel the specificities of Sahara bacterium *Deinococcus deserti*. *PLoS Genet* 2009, 5, e1000434.

[4] Blonder, J., Goshe, M. B., Moore, R. J., Pasa-Tolic, L., *et al.*, Enrichment of integral membrane proteins for proteomic analysis using liquid chromatography-tandem mass spectrometry. *J Proteome Res* 2002, 1, 351-360.

### Supporting Information Table 5. Primers used in this study

| Gene name | Primers                                                 | Sources   |
|-----------|---------------------------------------------------------|-----------|
| Dgeo_3006 | 5' <u>CATATG</u> CCCCAGACCCCCAC 3' ( <i>NdeI</i> )      | This work |
| Dgeo_3006 | 5' <u>GGATCC</u> CTACGCCACCCCAGGCC 3' ( <i>Bam</i> HI)  | This work |
| Dgeo_0695 | 5' <u>CATATG</u> AAAAAAGGCCTAACCC 3' ( <i>NdeI</i> )    | This work |
| Dgeo_0695 | 5' <u>GGATCC</u> TTACTTGCTGGGCACCTG 3' ( <i>Bam</i> HI) | This work |
| Dgeo_1754 | 5' <u>CATATG</u> AACCTTCTGGCGCTGATCC 3' ( <i>NdeI</i> ) | This work |
| Dgeo_1754 | 5' <u>GGATCC</u> TCACCGTGCCGCCCA 3' ( <i>Bam</i> HI)    | This work |

Restriction sites are underlined and restriction enzymes are indicated in parenthesis.
